# Supplementary figures and images for: An assessment of latest Cretaceous Pycnodonte vesicularis (Lamarck, 1806) shells as records for palaeoseasonality: A multi-proxy investigation
Source: Copernicus journal article supplement (doi:10.5194/cp-2017-120), 2017-10-11

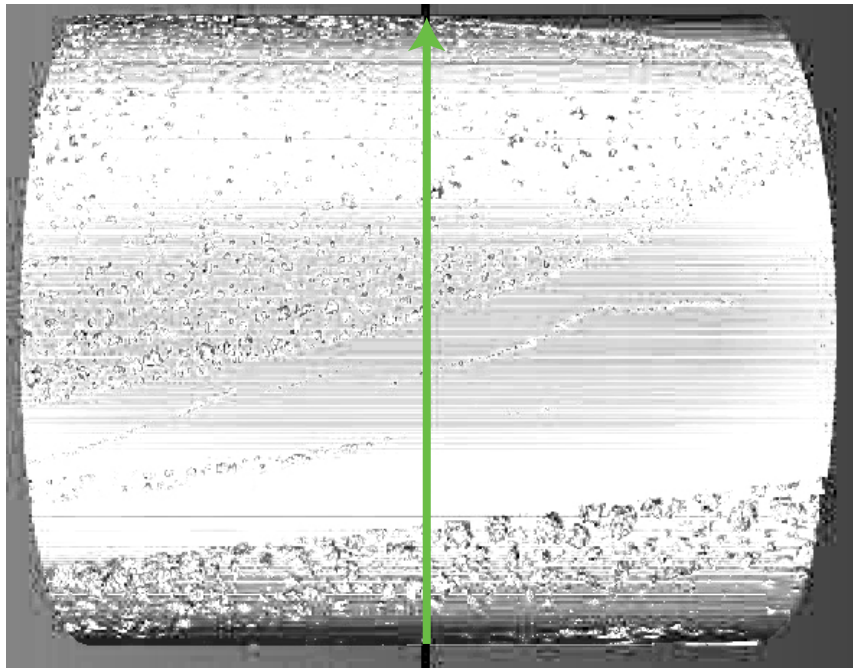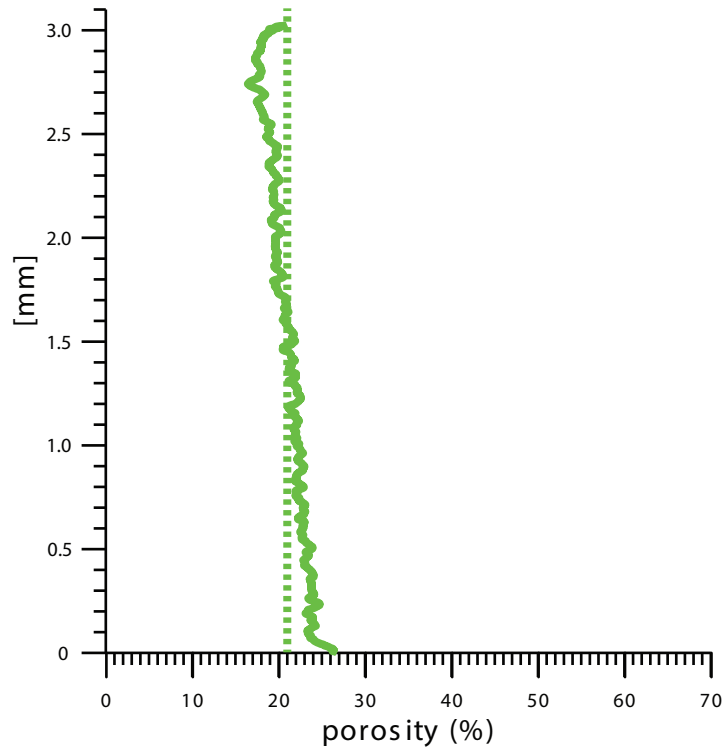

Supplement: Supplementary file 1 [file cp-2017-120-supplement.zip]
